# Supplementary material
Source: PubMed Central journal article supplement (PMC3288122)
Supplement: NIHMS346213-supplement-01.pdf [file NIHMS346213-supplement-01.pdf]

**Supplementary Table 1:**

Suprathreshold clusters of Smoking Cue > Neutral Cue fMRI activation from the ALE meta-analysis of studies of non-deprived smokers.

|    | Volume | Location (mm) |     |     | Hem | Brain Area                                     |
|----|--------|---------------|-----|-----|-----|------------------------------------------------|
|    |        | x             | y   | z   |     |                                                |
| 1  | 5520   | -3            | -49 | 28  | L   | Precuneus, Posterior Cingulate Gyrus           |
| 2  | 5288   | -1            | 41  | 0   | B   | Anterior Cingulate Gyrus, Medial Frontal Gyrus |
| 3  | 4040   | 37            | -71 | -9  | R   | Fusiform Gyrus, Middle Occipital Gyrus         |
| 4  | 2176   | -12           | -68 | 7   | L   | Cuneus, Lingual Gyrus                          |
| 5  | 2104   | -44           | -70 | 13  | L   | Middle Temporal Gyrus                          |
| 6  | 1552   | 43            | -32 | 3   | R   | Superior Temporal Gyrus                        |
| 7  | 1520   | -10           | -82 | 30  | L   | Cuneus                                         |
| 8  | 1024   | -5            | 23  | 23  | L   | Anterior Cingulate Gyrus                       |
| 9  | 992    | 3             | 34  | 18  | B   | Anterior Cingulate Gyrus                       |
| 10 | 976    | -52           | -50 | 24  | L   | Supramarginal Gyrus                            |
| 11 | 768    | 53            | -63 | 20  | R   | Middle Temporal Gyrus                          |
| 12 | 728    | -41           | -67 | -15 | L   | Cerebellar Declive, Fusiform Gyrus             |
| 13 | 720    | -10           | -69 | -15 | L   | Cerebellar Declive, Lingual Gyrus              |
| 14 | 696    | -16           | 40  | 39  | L   | Superior Frontal Gyrus                         |
| 15 | 384    | -12           | -35 | -29 | L   | Brain Stem                                     |
| 16 | 384    | 15            | -71 | 46  | R   | Precuneus                                      |
| 17 | 384    | 34            | -21 | 57  | R   | Precentral Gyrus                               |
| 18 | 352    | 16            | 47  | 20  | R   | Superior Frontal Gyrus                         |
| 19 | 336    | 8             | -23 | 26  | R   | Posterior Cingulate Gyrus                      |
| 20 | 320    | -46           | -62 | 28  | L   | Middle Temporal Gyrus                          |
| 21 | 304    | 15            | -82 | 31  | R   | Cuneus                                         |
| 22 | 288    | -39           | -4  | -23 | L   | Fusiform Gyrus                                 |
| 23 | 288    | 12            | -91 | 7   | R   | Cuneus                                         |
| 24 | 288    | 54            | -31 | 31  | R   | Inferior Parietal Lobule                       |
| 25 | 288    | 9             | 20  | 31  | R   | Anterior Cingulate Gyrus                       |
| 26 | 288    | 6             | -49 | 49  | R   | Precuneus                                      |
| 27 | 288    | 3             | -37 | 64  | R   | Paracentral Lobule                             |
| 28 | 256    | 39            | -49 | -23 | R   | Cerebellar Culmen, Fusiform Gyrus              |
| 29 | 256    | 5             | -45 | -19 | R   | Cerebellar Anterior Lobe                       |
| 30 | 248    | 6             | -76 | 25  | R   | Cuneus                                         |
| 31 | 232    | 12            | -52 | 61  | R   | Precuneus                                      |
| 32 | 232    | -27           | -1  | 64  | L   | Superior Frontal Gyrus                         |
| 33 | 224    | 16            | -10 | -5  | R   | Globus Pallidus                                |
| 34 | 224    | -48           | -40 | 7   | L   | Middle Temporal Gyrus                          |
| 35 | 224    | 0             | -16 | 34  | L   | Posterior Cingulate Gyrus                      |
| 36 | 224    | 18            | -37 | 40  | R   | Posterior Cingulate Gyrus                      |
| 37 | 216    | -18           | -22 | -14 | L   | Parahippocampal Gyrus                          |
| 38 | 216    | 24            | -82 | 10  | R   | Cuneus                                         |
| 39 | 216    | -30           | -34 | 52  | L   | Postcentral Gyrus                              |
| 40 | 216    | 0             | -10 | 64  | L   | Medial Frontal Gyrus                           |

Note: Cluster *volume* is measured in mm<sup>3</sup>. Cluster *location* refers to the weighted center of mass of each cluster, measured in Talairach coordinates. *Hem* = Hemisphere, *L* = Left, *R* = Right, *B* = Bilateral.

**Supplementary Table 2:**

Suprathreshold clusters of Smoking Cue > Neutral Cue fMRI activation from the ALE meta-analysis of studies of deprived smokers.

|    | Volume | Location (mm) |     |     | Hem | Brain Area                                   |
|----|--------|---------------|-----|-----|-----|----------------------------------------------|
|    |        | x             | y   | z   |     |                                              |
| 1  | 2480   | -12           | 48  | 30  | L   | Superior Frontal Gyrus, Medial Frontal Gyrus |
| 2  | 2296   | 8             | -77 | -19 | R   | Cerebellar Declive, Lingual Gyrus            |
| 3  | 1496   | -40           | -64 | -18 | L   | Cerebellar Declive, Fusiform Gyrus           |
| 4  | 1432   | -23           | -82 | 30  | L   | Cuneus                                       |
| 5  | 1368   | -2            | -44 | 53  | L   | Precuneus, Paracentral Lobule                |
| 6  | 704    | 29            | -5  | 1   | R   | Putamen                                      |
| 7  | 704    | -11           | -59 | 15  | L   | Posterior Cingulate Gyrus                    |
| 8  | 656    | -22           | -58 | 4   | L   | Lingual Gyrus                                |
| 9  | 640    | -30           | -1  | -7  | L   | Putamen                                      |
| 10 | 640    | -27           | -27 | 14  | L   | Insula                                       |
| 11 | 640    | -7            | -36 | 31  | L   | Posterior Cingulate Gyrus                    |
| 12 | 640    | -15           | -60 | 61  | L   | Superior Parietal Lobule                     |
| 13 | 560    | 10            | -21 | 22  | R   | Posterior Cingulate Gyrus                    |
| 14 | 560    | 17            | -64 | 40  | R   | Precuneus                                    |
| 15 | 560    | 28            | -28 | 45  | R   | Postcentral Gyrus                            |
| 16 | 456    | 42            | -76 | -12 | R   | Fusiform Gyrus                               |
| 17 | 456    | -26           | 32  | 47  | L   | Middle Frontal Gyrus                         |
| 18 | 448    | -37           | -15 | -30 | L   | Uncus                                        |
| 19 | 448    | 43            | -5  | -24 | R   | Fusiform Gyrus                               |
| 20 | 448    | 27            | 9   | -22 | R   | Uncus                                        |
| 21 | 448    | 0             | 41  | 1   | R   | Anterior Cingulate Gyrus                     |
| 22 | 448    | 35            | 27  | 40  | R   | Middle Frontal Gyrus                         |
| 23 | 448    | -1            | 11  | 42  | L   | Anterior Cingulate Gyrus                     |
| 24 | 440    | 43            | -69 | 40  | R   | Precuneus                                    |
| 25 | 432    | -23           | -1  | 64  | L   | Superior Frontal Gyrus                       |
| 26 | 424    | -23           | 45  | -10 | L   | Middle Frontal Gyrus                         |
| 27 | 344    | -33           | 48  | 26  | L   | Superior Frontal Gyrus                       |
| 28 | 328    | 7             | 46  | 45  | R   | Superior Frontal Gyrus                       |

Note: Cluster *volume* is measured in mm<sup>3</sup>. Cluster *location* refers to the weighted center of mass of each cluster, measured in Talairach coordinates. *Hem* = Hemisphere, *L* = Left, *R* = Right.

**Supplementary Table 3:**

Suprathreshold clusters of Smoking Cue > Neutral Cue fMRI activation from the ALE meta-analysis of studies with short stimulus durations ( $\leq 5$  s).

|    | Volume | Location (mm) |     |     | Hem | Brain Area                                     |
|----|--------|---------------|-----|-----|-----|------------------------------------------------|
|    |        | x             | y   | z   |     |                                                |
| 1  | 2104   | 38            | -73 | -11 | R   | Fusiform Gyrus                                 |
| 2  | 2056   | -42           | -66 | -15 | L   | Cerebellar Declive, Fusiform Gyrus             |
| 3  | 1968   | 0             | 40  | 1   | B   | Anterior Cingulate Gyrus, Medial Frontal Gyrus |
| 4  | 1960   | -15           | 43  | 36  | L   | Superior Frontal Gyrus                         |
| 5  | 1368   | 5             | -48 | 24  | R   | Posterior Cingulate Gyrus                      |
| 6  | 1232   | 41            | -32 | 3   | R   | Superior Temporal Gyrus                        |
| 7  | 1120   | 10            | -79 | 28  | R   | Cuneus                                         |
| 8  | 648    | -8            | -50 | 40  | L   | Precuneus                                      |
| 9  | 640    | -12           | -35 | -29 | L   | Brain Stem                                     |
| 10 | 640    | 7             | 33  | 18  | R   | Anterior Cingulate Gyrus                       |
| 11 | 640    | -7            | -35 | 28  | L   | Posterior Cingulate Gyrus                      |
| 12 | 640    | 15            | -71 | 46  | R   | Precuneus                                      |
| 13 | 640    | 34            | -21 | 57  | R   | Precentral Gyrus                               |
| 14 | 592    | -7            | -83 | 29  | L   | Cuneus                                         |
| 15 | 560    | -15           | -70 | 6   | L   | Cuneus, Lingual Gyrus                          |
| 16 | 560    | 16            | 47  | 20  | R   | Superior Frontal Gyrus                         |
| 17 | 536    | 12            | -52 | 61  | R   | Precuneus                                      |
| 18 | 512    | 24            | -82 | 10  | R   | Cuneus                                         |
| 19 | 496    | 6             | -49 | 49  | R   | Precuneus                                      |
| 20 | 480    | -15           | -65 | -13 | L   | Cerebellar Declive, Fusiform Gyrus             |
| 21 | 480    | -48           | -40 | 7   | L   | Middle Temporal Gyrus                          |
| 22 | 480    | -39           | -64 | 10  | L   | Middle Temporal Gyrus                          |
| 23 | 480    | 18            | -37 | 40  | R   | Posterior Cingulate Gyrus                      |
| 24 | 464    | 12            | -91 | 7   | R   | Cuneus                                         |
| 25 | 456    | -18           | -22 | -14 | L   | Parahippocampal Gyrus                          |
| 26 | 456    | 0             | -16 | 34  | B   | Posterior Cingulate Gyrus                      |
| 27 | 456    | -30           | -34 | 52  | L   | Postcentral Gyrus                              |
| 28 | 456    | 0             | -10 | 64  | B   | Medial Frontal Gyrus                           |
| 29 | 448    | 39            | -49 | -23 | R   | Cerebellar Culmen, Fusiform Gyrus              |
| 30 | 448    | -39           | -4  | -23 | L   | Fusiform Gyrus                                 |
| 31 | 448    | 5             | -45 | -19 | R   | Cerebellar Anterior Lobe                       |
| 32 | 448    | 54            | -31 | 31  | R   | Inferior Parietal Lobule                       |
| 33 | 448    | 9             | 20  | 31  | R   | Anterior Cingulate Gyrus                       |
| 34 | 448    | 3             | -37 | 64  | R   | Paracentral Lobule                             |
| 35 | 384    | 6             | 32  | 56  | R   | Superior Frontal Gyrus                         |
| 36 | 352    | 12            | -74 | -17 | R   | Cerebellar Declive, Lingual Gyrus              |
| 37 | 336    | -27           | -1  | 63  | L   | Superior Frontal Gyrus                         |
| 38 | 256    | -42           | -67 | 47  | L   | Inferior Parietal Lobule                       |

Note: Cluster *volume* is measured in mm<sup>3</sup>. Cluster *location* refers to the weighted center of mass of each cluster, measured in Talairach coordinates. *Hem* = Hemisphere, *L* = Left, *R* = Right, *B* = Bilateral.

**Supplementary Table 4:**

Suprathreshold clusters of Smoking Cue > Neutral Cue fMRI activation from the ALE meta-analysis of studies with long stimulus durations ( $\geq 18$  s).

|    | Volume | Location (mm) |     |     | Hem | Brain Area                         |
|----|--------|---------------|-----|-----|-----|------------------------------------|
|    |        | x             | y   | z   |     |                                    |
| 1  | 5944   | -9            | -59 | 19  | L   | Precuneus                          |
| 2  | 4072   | -2            | 41  | 0   | L   | Anterior Cingulate Gyrus           |
| 3  | 1736   | -46           | -72 | 13  | L   | Middle Temporal Gyrus              |
| 4  | 1576   | -50           | -54 | 25  | L   | Superior Temporal Gyrus            |
| 5  | 1488   | 39            | -64 | -7  | R   | Middle Occipital Gyrus             |
| 6  | 1128   | 32            | -82 | -10 | R   | Middle Occipital Gyrus             |
| 7  | 1104   | -5            | 23  | 23  | L   | Anterior Cingulate Gyrus           |
| 8  | 1080   | 9             | -22 | 24  | R   | Posterior Cingulate Gyrus          |
| 9  | 1072   | -13           | -85 | 33  | L   | Cuneus                             |
| 10 | 1032   | -4            | -33 | 32  | L   | Posterior Cingulate Gyrus          |
| 11 | 792    | 53            | -63 | 20  | R   | Middle Temporal Gyrus              |
| 12 | 768    | -12           | 47  | 29  | L   | Superior Frontal Gyrus             |
| 13 | 640    | 6             | -79 | -19 | R   | Cerebellar Declive, Lingual Gyrus  |
| 14 | 488    | -14           | -74 | 26  | L   | Cuneus                             |
| 15 | 456    | -6            | -72 | -16 | L   | Cerebellar Declive, Lingual Gyrus  |
| 16 | 400    | -1            | 36  | 18  | L   | Anterior Cingulate Gyrus           |
| 17 | 384    | -30           | -1  | -7  | L   | Putamen                            |
| 18 | 384    | -27           | -27 | 14  | L   | Insula                             |
| 19 | 384    | -2            | -37 | 55  | L   | Paracentral Lobule                 |
| 20 | 384    | -15           | -60 | 61  | L   | Superior Parietal Lobule           |
| 21 | 352    | -38           | -63 | -20 | L   | Cerebellar Declive, Fusiform Gyrus |
| 22 | 352    | 16            | -10 | -5  | R   | Globus Pallidus                    |
| 23 | 352    | 45            | -32 | 4   | R   | Superior Temporal Gyrus            |
| 24 | 352    | 17            | -64 | 40  | R   | Precuneus                          |
| 25 | 352    | 28            | -28 | 45  | R   | Postcentral Gyrus                  |
| 26 | 296    | -29           | -79 | 29  | L   | Cuneus                             |
| 27 | 296    | -26           | 32  | 47  | L   | Middle Frontal Gyrus               |
| 28 | 272    | 29            | -5  | 1   | R   | Putamen                            |
| 29 | 272    | -2            | -50 | 50  | L   | Precuneus                          |

Note: Cluster *volume* is measured in mm<sup>3</sup>. Cluster *location* refers to the weighted center of mass of each cluster, measured in Talairach coordinates. *Hem* = Hemisphere, *L* = Left, *R* = Right, *B* = Bilateral.
